# Supplementary material for: Three viruses of the bovine respiratory disease complex apply different strategies to initiate infection
Source: PubMed Central journal article supplement (PMC3942114; doi:10.1186/1297-9716-45-20), 2014-02-18

day 1

day 2

day 3

day 4

day 5

MOI ~ 0.1

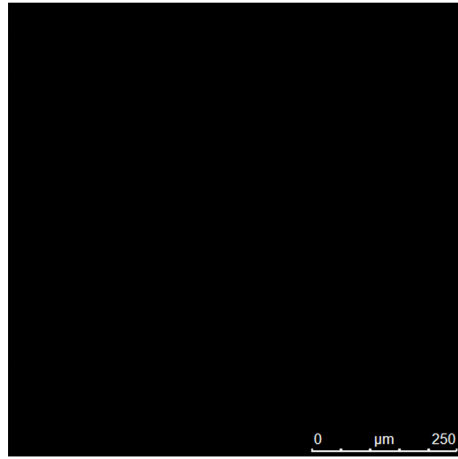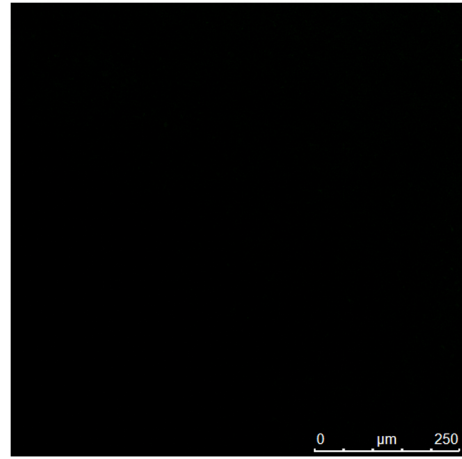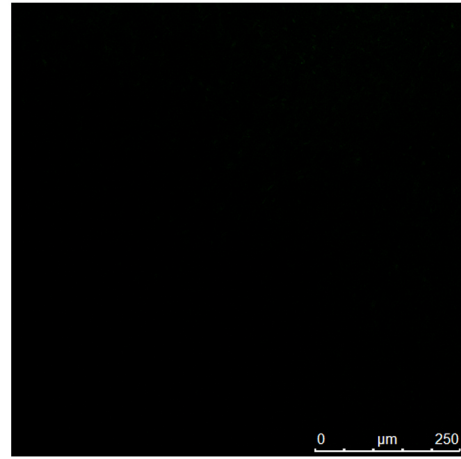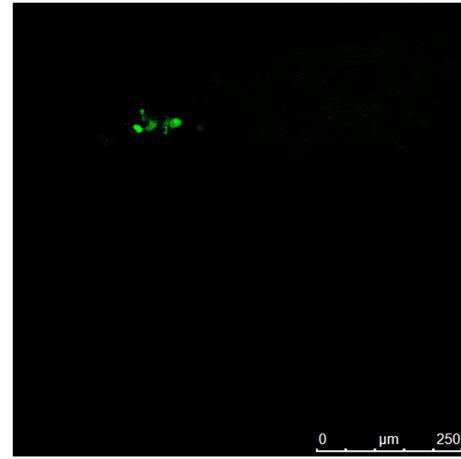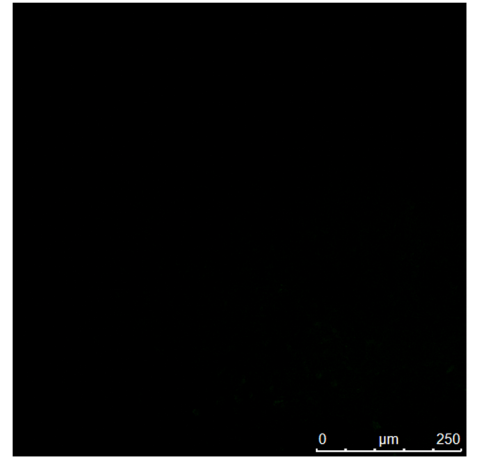

MOI ~ 1.0

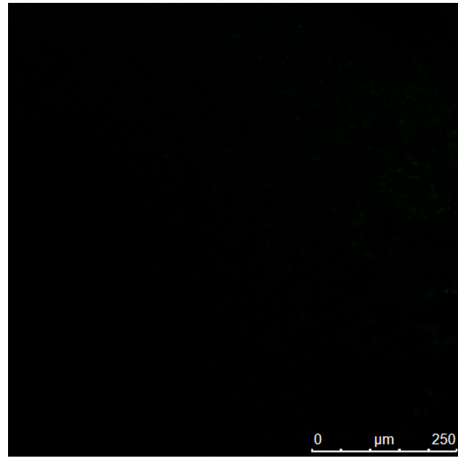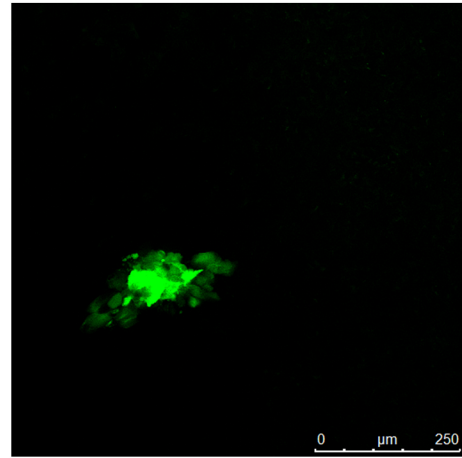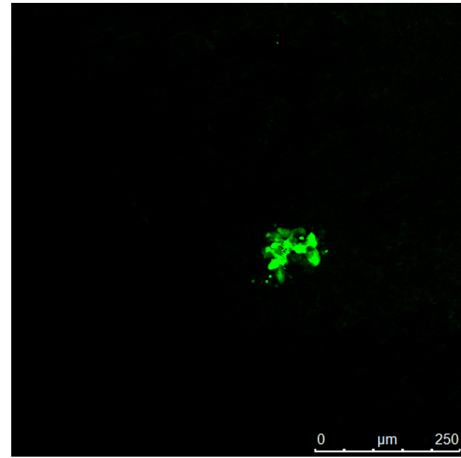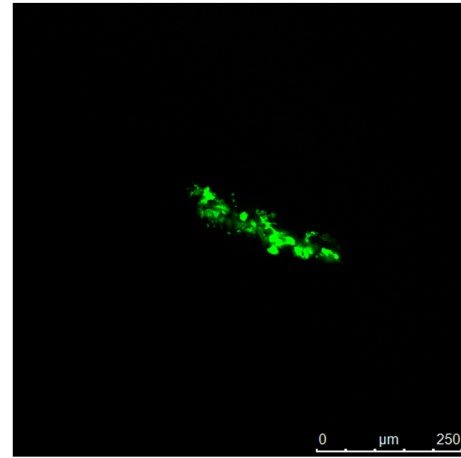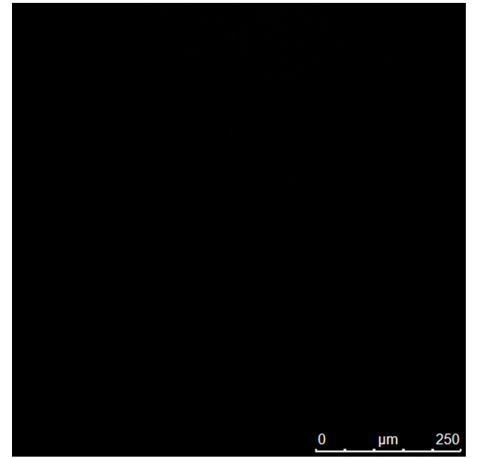

MOI ~ 10

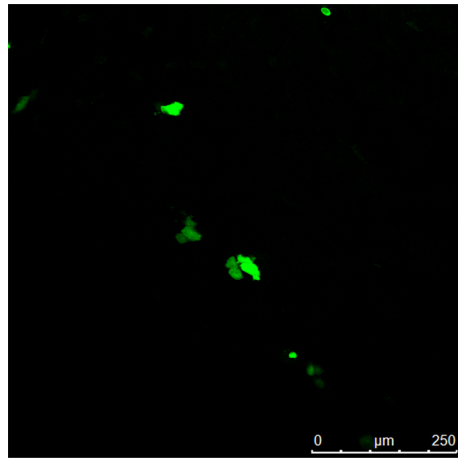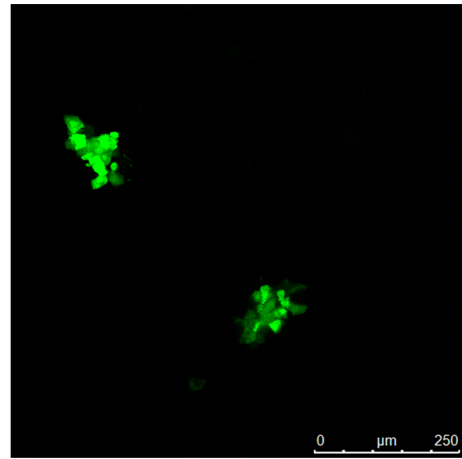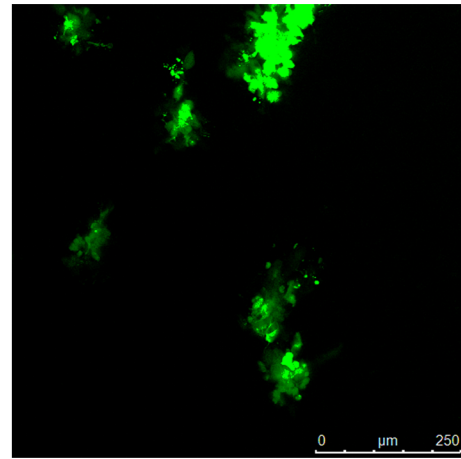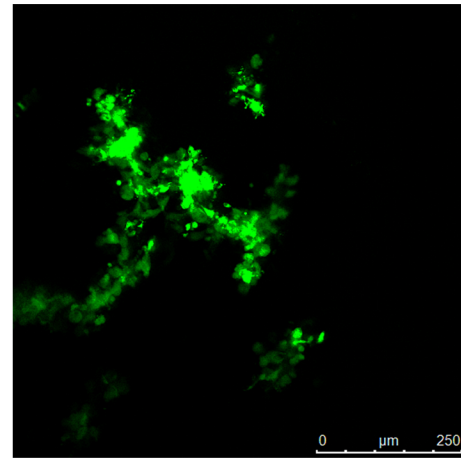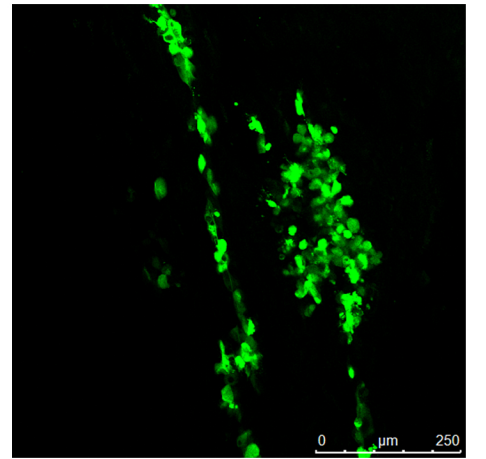

Supplement: 1297-9716-45-20-S1.pdf [file 1297-9716-45-20-S1.pdf]
