# Supplementary material for: Three viruses of the bovine respiratory disease complex apply different strategies to initiate infection
Source: PubMed Central journal article supplement (PMC3942114; doi:10.1186/1297-9716-45-20), 2014-02-18

TTF-1

BRSV-GFP

DAPI

overlay

TTF-1-positive

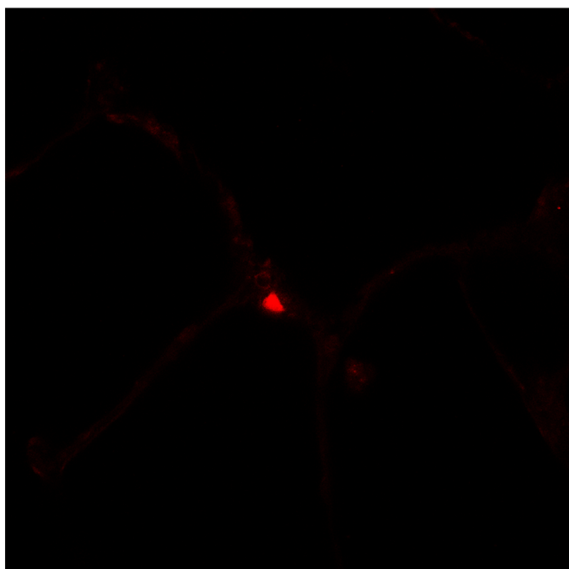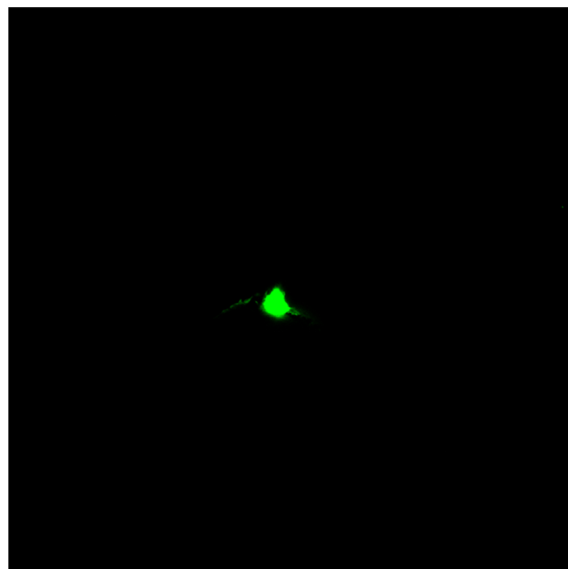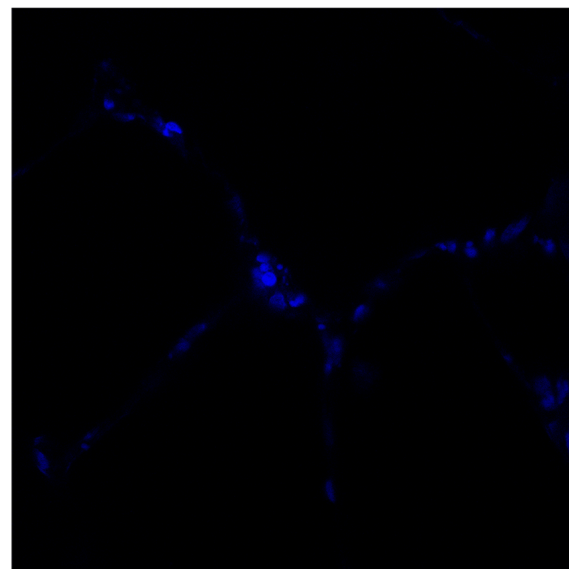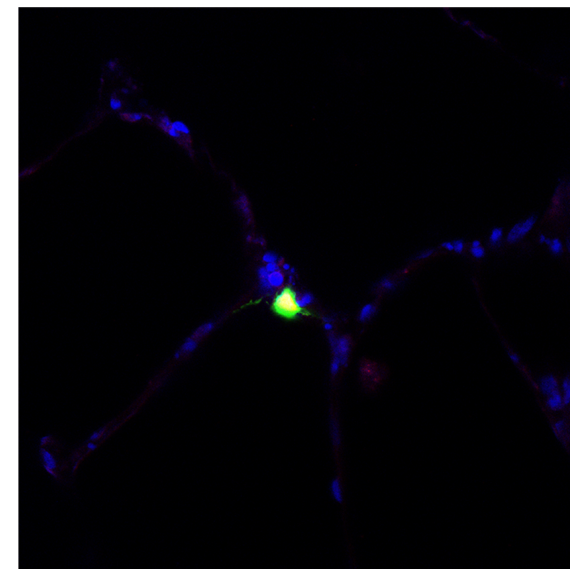

TTF-1-negative

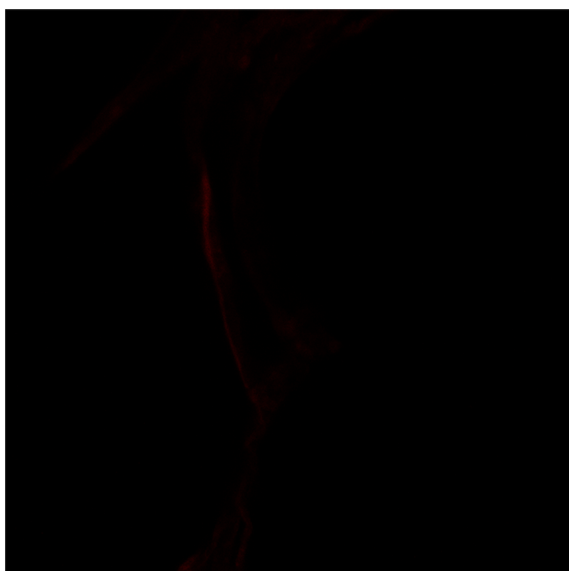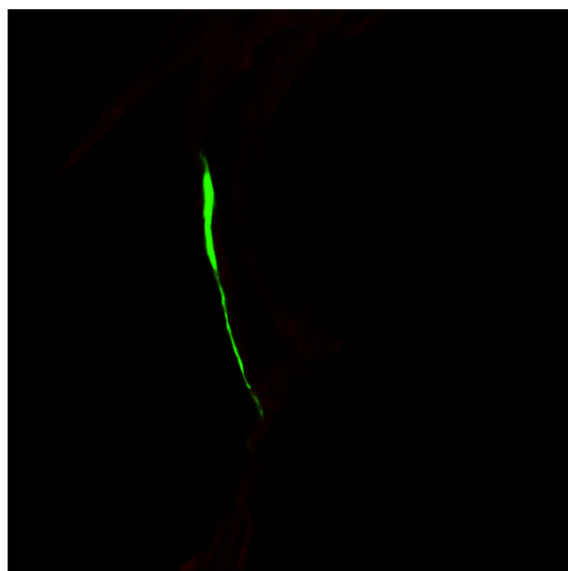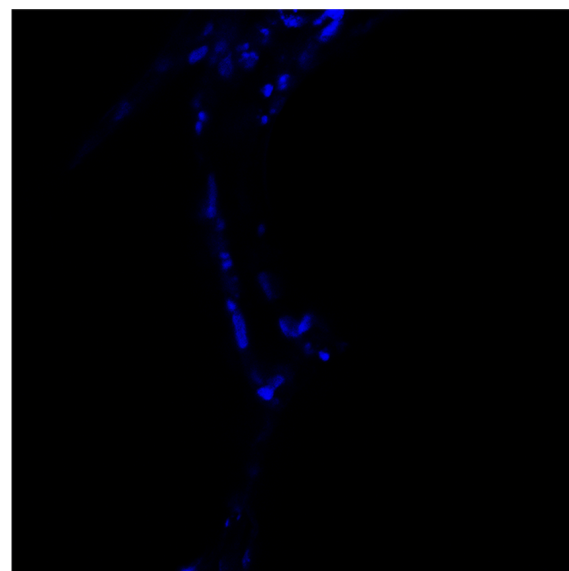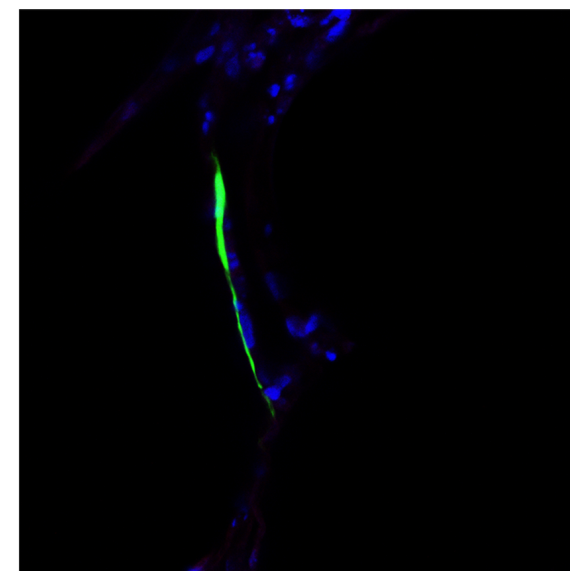

control

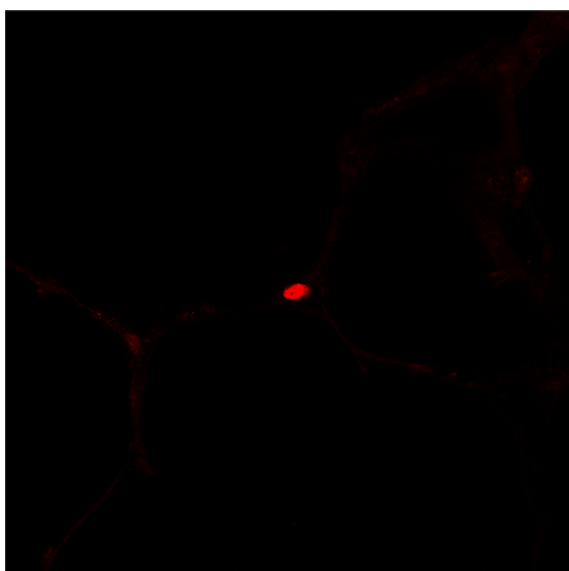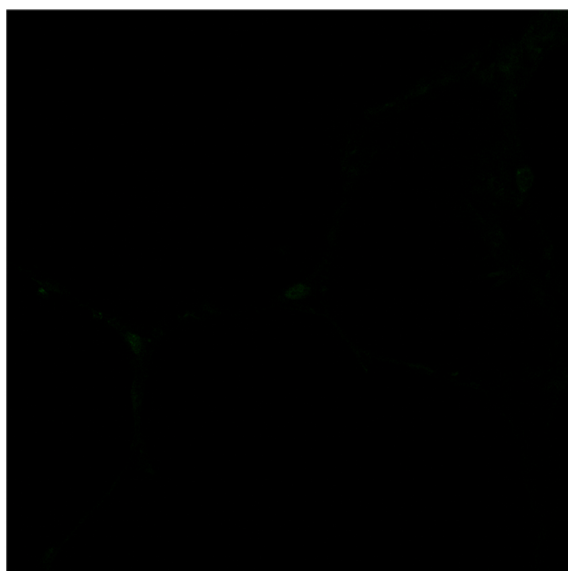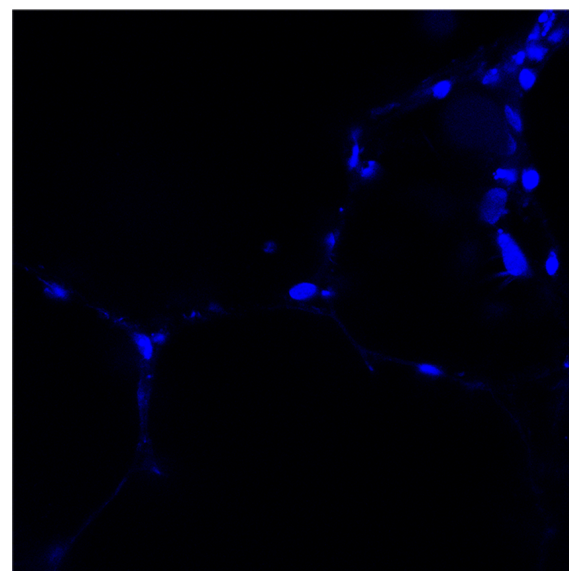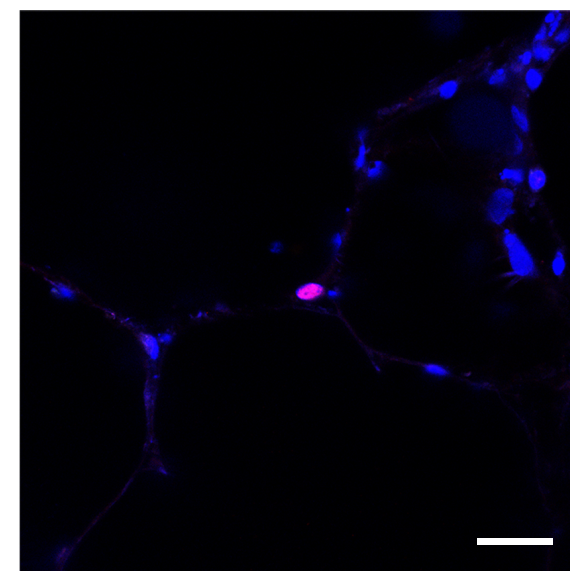

Supplement: 1297-9716-45-20-S3.pdf [file 1297-9716-45-20-S3.pdf]
